# Supplementary material for: A retrospective study: cardiac MRI of fulminant myocarditis in children—can we evaluate the short-term outcomes?
Source: PeerJ. 2016 Dec 15;4:e2750. doi: 10.7717/peerj.2750 (PMC5162402; doi:10.7717/peerj.2750)
Supplement: Files S1 [file peerj-04-2750-s001.xlsx]

## Sheet: AS VS CS
stage	Patient	SEX	AGE	premonitory symptom	Clinical manifestations	Abnormal electrocardiogram	LVEF at onset	The highest levels ofTNT	CKMB	BNP	Intervals from onset to CMR(days)	heart rate	IVS thickness（4ch+sa mm）	EDV	ESV	EF	FS	LVM	SV	LVEDD	T2 ratio	EGEr	LGE location	LGE segments	LGE area mm2					1
AS	A1	F	9	fever 3 days	Gastrointestinal symptoms, fatigue, shortness of breath, heart failure, cardiac shock	ST-T changes，ICRBBB	0.25	129.4	3.65	6047	7	74	7.9	43.6	13.6	68.8	27.2	35.1	30	38.6	2.21	5.4	anterolateral mid-wall	4	115
	B1	M	14	common cold 2 weeks	Chest pain/distress, vomiting, heart failure	ST-T changes	0.36	1414	79.69	546.1	7	65	10	57	14.5	74.5	28.4	63.6	42.5	43.7	1.77		inferolateral Subepicardial	4	134
	C1	M	3	Gastrointestinal symptoms one day	fever, fatigue, seizure,heart failure, cardiac shock	ST-T changes，wide QRS complex, III°AVB	0.48	3486	76	28281	10	95	9.1	32.2	8.4	73.8	40.7	29.7	23.7	34.9	2.06	5.7	inferolateral mid-wall	3	112
	D1	F	8	fever, Gastrointestinal symptoms 3 days	Gastrointestinal symptoms, fatigue, heart failure, cardiac shock	ST-T changes	0.33	6457	23.05	18727	10	66	11	43	16.3	62.1	25.4	43.9	26.7	39	1.902	13.2	anterior, septal walls, mid-wall	3	165
	E1	M	13	fever,common cold 4 days	heart failure, vomiting, seizure	ST-T changes, III°AVB	0.38	1967	25.64	2906	10	76	14	43.7	10.1	76.8	23.6	66.6	33.6	35.7	1.98	11.6	septal walls, mid-wall	4	103
	F1	M	12	fever, Gastrointestinal symptoms, headache 4 days	Gastrointestinal symptoms,Chest pain/distress, headache, seizure, heart failure	ST-T changes，ICLBBB, III°AVB	0.42	1791	23.51	16806	10	65	13.1	66	19.9	69.8	47	68.6	46	38.9	2.24		septal walls, mid-wall	1	84
	G1	M	6	fever, Shortness of Breath 5 days	Gastrointestinal symptoms, fatigue, shortness of breath, heart failure, cardiac shock	ST-T changes，LBBB, III°AVB	0.44	1632	8.89	31648	12	96	15.4	26.3	4.3	83.7	50.9	48.8	22	28.5	2.08		inferoseptal wall, inferior, mid-wall	2	117
	H1	F	7	fever, Gastrointestinal symptoms 7 days	Gastrointestinal symptoms, fatigue, seizure, headache heart failure, cardiac shock	ST-T changes, III°AVB	0.26	1620		3065	20	94	6.7	44.8	15.8	64.7	32.4	34.5	28.9	35	2.01	8.4	none	0	0
CS	A2	F	9								33	90	7.2	43.9	17.1	61.1	35.5	31.2	26.8	37.4	1.99		smaller	4	80
	B2	M	14								57	69	8.3	66.6	22.1	66.8	30.8	53.3	44.4	46.2	1.86		smaller	4	80
	C2	M	3								54	75	6.1	38.5	13.6	64.7	36.1	24.9	24.9	35.5	1.83	3.5	none	0	0
	D2	F	8								75	83	8.9	58.9	25.9	56	23.8	38.9	33	42.1	1.85		smaller	3	125
	E2	M	13								56	79	8.8	69.4	21.6	68.8	33.8	52.4	47.8	39.8	1.64		none	0	0
	F2	M	12								63	93	9.9	65.7	27.5	58.1	29.4	46.3	38.2	38.5	1.68		none	0	0
	G2	M	6								46	111	8.8	26.7	5.6	79	30.5	25.5	21.1	31	1.75		none	0	0
	H2	F	7								48	95	7	35.4	12.5	64.6	32.8	22.9	26.8	36.5	1.78		none	0	0
